# Supplementary material for: Towards a comprehensive evaluation of dimension reduction methods for transcriptomic data visualization
Source: PubMed Central journal article supplement (PMC9296444; doi:10.1038/s42003-022-03628-x), 2022-07-19
Supplement: 42003_2022_3628_MOESM2_ESM.pdf [file 42003_2022_3628_MOESM2_ESM.pdf]

## Description of Additional Supplementary Files

**File name:** Supplementary Data 1

**Description:** The source data of each evaluation in the paper.
